# Supplementary material
Source: publisher figshare collection journal article supplement (https://future-science-group.figshare.com/ndownloader/files/30809899)
Supplement: Supplementary file 1 [file 30809899]

**Table S1**: Microbial biocompatibility of *Tinospora cordifolia* stem derived carbon dots (TCSCDs)

| **Type of microorganism** | **Microorganism** | **Zone of Inhibition (mm)** | | | |
| --- | --- | --- | --- | --- | --- |
|  |  | **TCSAE (159.5 µg/disc)** | **TCSCD (159.5 µg/disc)** | **Ciprofloxacin (20 µg/disc)** | **Water (10 µL)** |
| **Gram negative strains** | *Escherichia coli* | -- | -- | 35±0.02 | -- |
| *Klebsiella pneumoniae* | -- | -- | 45±0.023 | -- |
| *Edwardsiella tarda* | -- | -- | 23±0.041 | -- |
| *Aeromonas hydrophila* | -- | -- | 27±0.013 | -- |
| **Gram positive strains** | *Staphylococcus aureus* | -- | -- | 27±0.032 | -- |
| *Enterococcus faecalis* | -- | -- | 23±0.012 | -- |
